# Supplementary material for: Phosphorylated ubiquitin chain is the genuine Parkin receptor
Source: PubMed Central journal article supplement — J Cell Biol. 2015 Apr 13;209(1):111–28. doi: 10.1083/jcb.201410050 (PMC4395490; doi:10.1083/jcb.201410050), 2015-04-13
Supplement: supp_jcb.201410050_JCB_201410050_sm.pdf [file supp_jcb.201410050_JCB_201410050_sm.pdf]

Okatsu et al., <http://www.jcb.org/cgi/content/full/jcb.201410050/DC1>

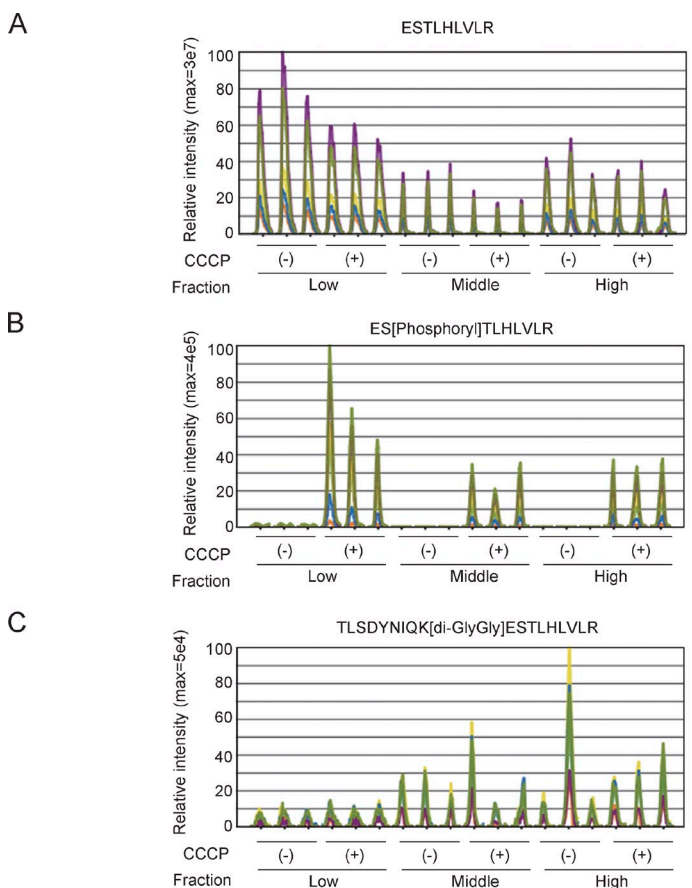

Figure S1. **Mass-spectrometry-based analysis of phosphorylated ubiquitin.** (A–C) Signals derived from the nonmodified peptide (ESTLHLVLR; A), the S65-phosphorylated peptide (ES[Phosphoryl]TLHLVLR; B), and the K63-GlyGly branch peptide (TLDYNIQK[di-GlyGly]ESTLHLVLR) were obtained by MS-based analyses from whole cell lysates. The unmodified peptide was detected in all fractions examined (A), whereas the S65-phosphorylated peptide was observed only in CCCP-treated fractions (B), and the peptide with the K63-GlyGly branch (TLDYNIQK[di-GlyGly]ESTLHLVLR) was detected in the middle (14,000–55,000) and the high (>55,000) molecular weight fractions (C). The data shown are from a single MS analysis of three independently prepared samples. (D) Extracted m/z 730.89644 ion chromatogram corresponding to the doubly charged ubiquitin peptide containing a diglycine branch at K48 in anti-K48-linked polyubiquitin chain antibody (Apu2) immunoprecipitates or control IgG. This experiment was completed once ( $n = 1$ ). (E) The diglycine branch at K48 is demonstrated by the MS/MS spectrum of the m/z 730.90 ion at a retention time of 17.23 min in Apu2 immunoprecipitates from CCCP-treated cells.

**D** EIC (extracted ion chromatogram) of m/z 730.89644 ± 5 ppm (43–54 a.a.; LIFAGK(GG)QLEDGR,  $[M+2H]^{2+}$ )

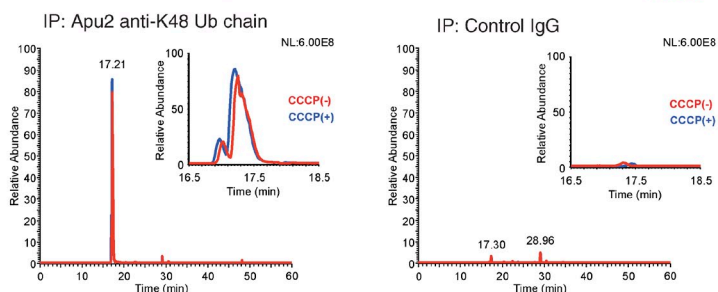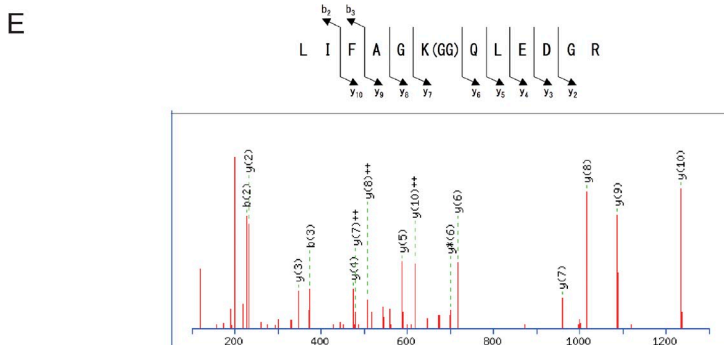

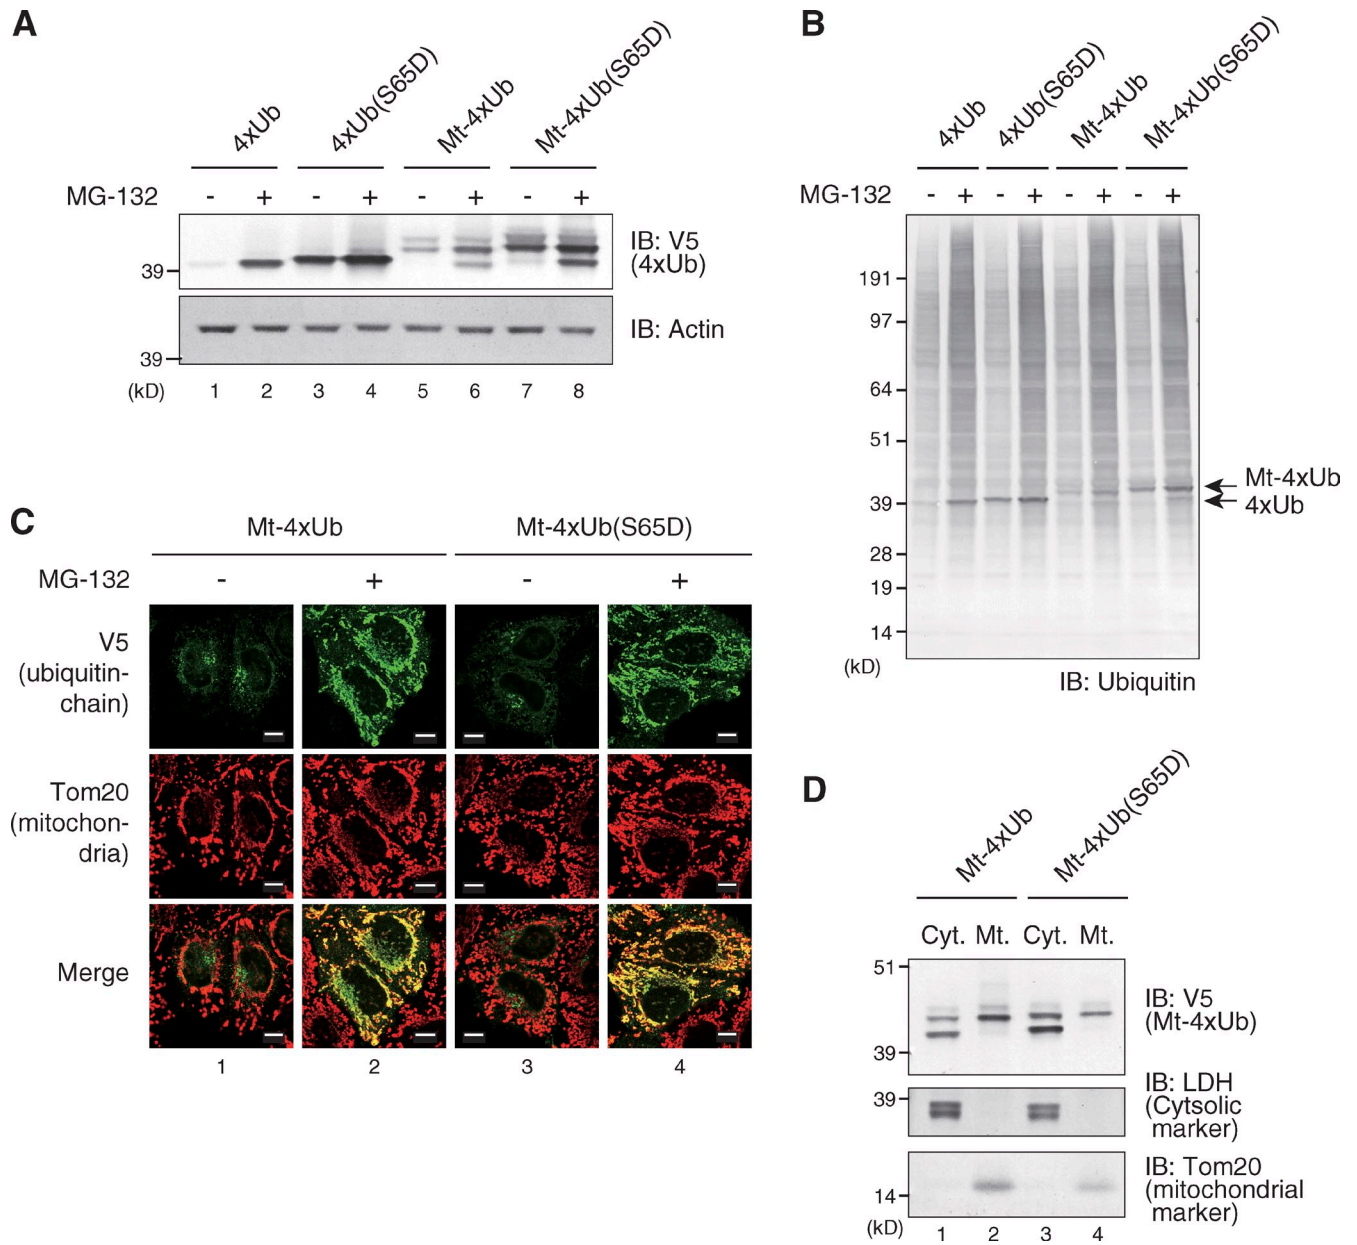

Figure S2. **Tandem tetra-ubiquitin targeting to mitochondria is stabilized by treatment with the proteasome inhibitor MG-132.** (A) HeLa cells expressing 4xUb, 4xUb(S65D), Mt-4xUb, or Mt-4xUb(S65D) were treated with MG-132 (10  $\mu$ M, 3 h) and immunoblotted using the indicated antibodies. In the tandem repeat ubiquitin proteins, a G76V mutation was introduced to impede ubiquitin processing enzymes. 4xUb and Mt-4xUb were clearly stabilized by MG-132 treatment. (B) The total cell lysates from A were immunoblotted using an anti-ubiquitin antibody P4D1. (C) Immunocytochemistry of HeLa cells expressing Mt-4xUb and Mt-4xUb(S65D) after MG-132 treatment (10  $\mu$ M, 3 h) confirmed that both Mt-4xUb and Mt-4xUb(S65D) localized on mitochondria. Bars, 10  $\mu$ m. (D) HeLa cells expressing Mt-4xUb and Mt-4xUb(S65D) were fractionated to obtain cytosolic (Cyt) and mitochondria-enriched (Mt) fractions, and immunoblotted with the indicated antibodies.

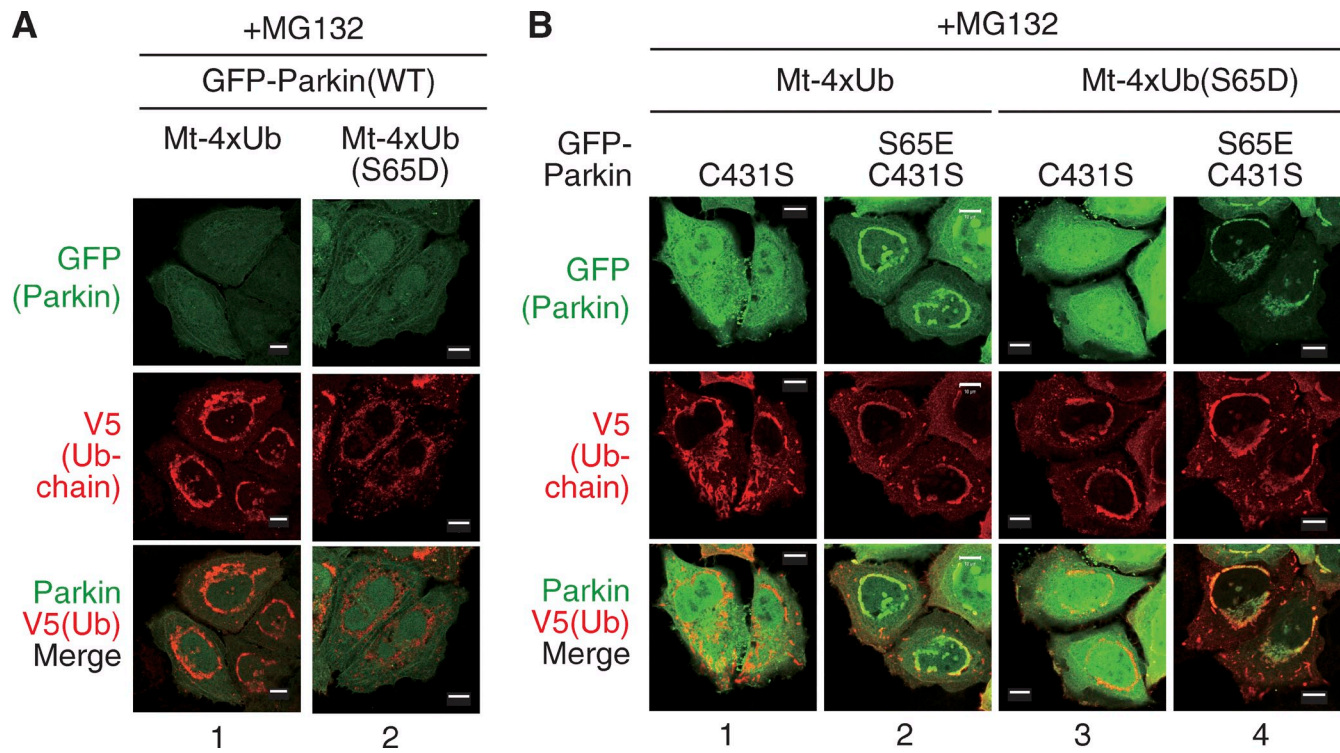

Figure S3. **Colocalization between Parkin and tetra-ubiquitin chain.** (A and B) HeLa cells expressing WT GFP-Parkin (A) or the indicated GFP-Parkin mutants (B) were coexpressed with Mt-4xUb or Mt-4xUb(S65D), treated with MG-132 (10  $\mu$ M, 3 h), and subjected to immunocytochemistry using an anti-GFP antibody and an anti-V5 antibody that detects Mt-4xUb. Bars, 10  $\mu$ m.

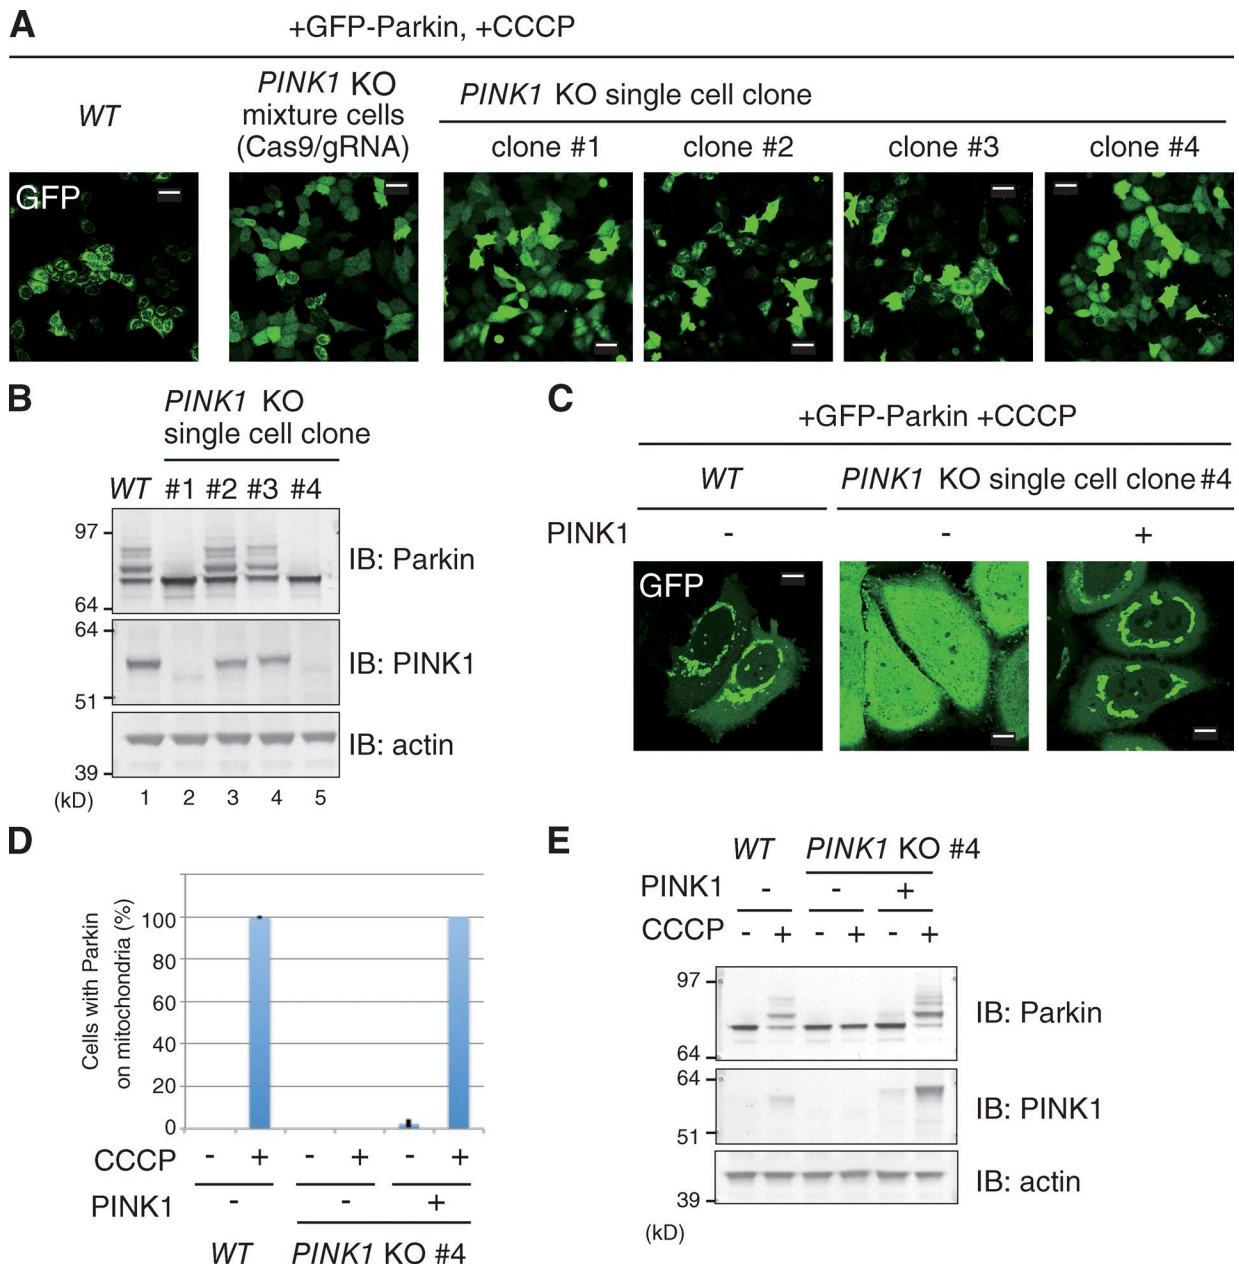

Figure S4. **Generation of *PINK1* KO HeLa cell line.** (A and B) WT HeLa cells, HeLa cells treated with the CRISPR/Cas9 system for *PINK1* KO, and the resulting candidate clonal cells (#1–4) were transfected with GFP-Parkin and treated with CCCP (10  $\mu$ M, 6 h). Mitochondrial localization of GFP-Parkin in these cells was observed with a fluorescence microscope (A), and *PINK1* expression and Parkin E3 activity were detected by immunoblotting with the indicated antibodies (B). Bars, 10  $\mu$ m. (C and D) Mislocalization of GFP-Parkin in clone #4 was complemented by reintroduction of *PINK1*. (C) The subcellular localization of GFP-Parkin in the indicated cells was observed with a fluorescence microscope after CCCP treatment (10  $\mu$ M, 6 h). Bars, 10  $\mu$ m. (D) The rate of Parkin mitochondrial localization in 100 cells was calculated in three independent experiments. Error bar represents the mean  $\pm$  SD (error bars). (E) Restoration of Parkin E3 activity by exogenous *PINK1*. *PINK1* KO HeLa cells expressing *PINK1* and GFP-Parkin were treated with 10  $\mu$ M CCCP for 6 h, and then immunoblotted with the indicated antibodies.

**A** *PINK1* KO HeLa cells with GFP-LC3, + MG-132

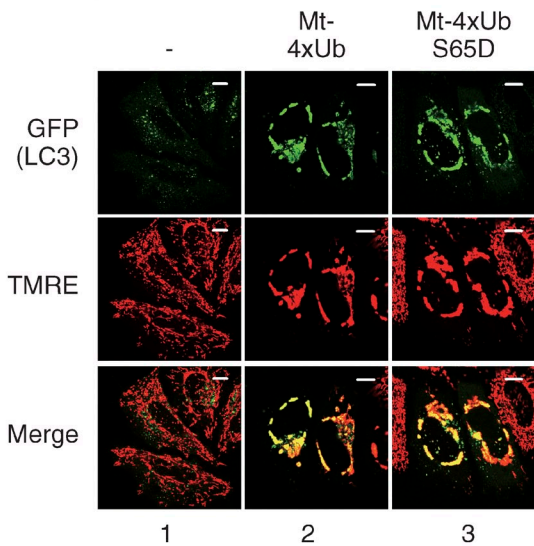

**B** *PINK1* KO HeLa cells, + MG-132

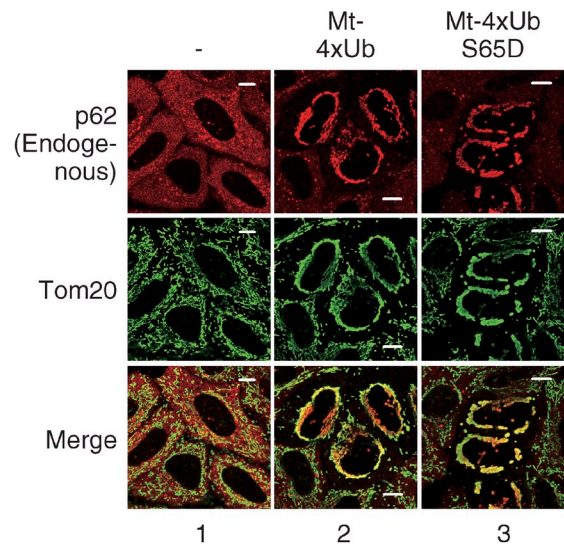

**C** Parkin WT S65E

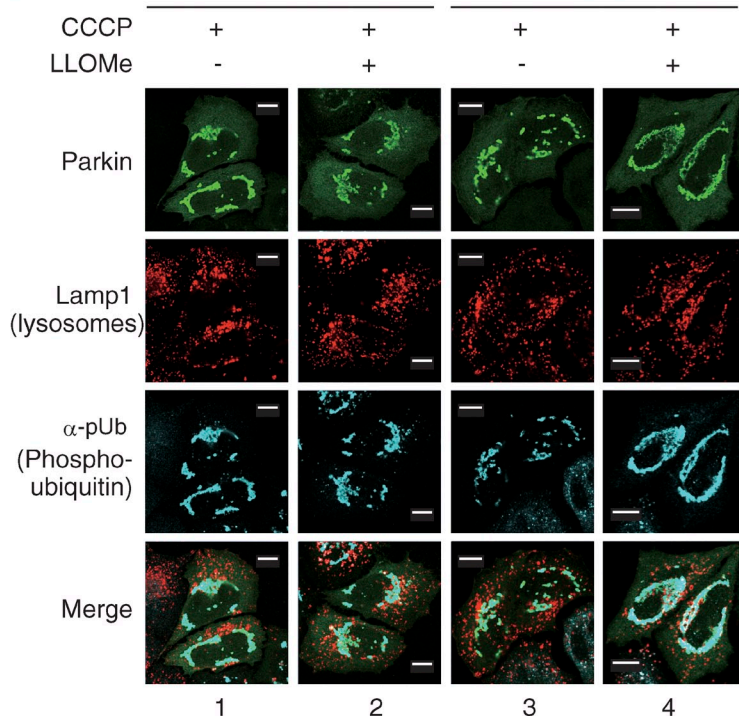

**D** GFP-Parkin(S65E/C431S)

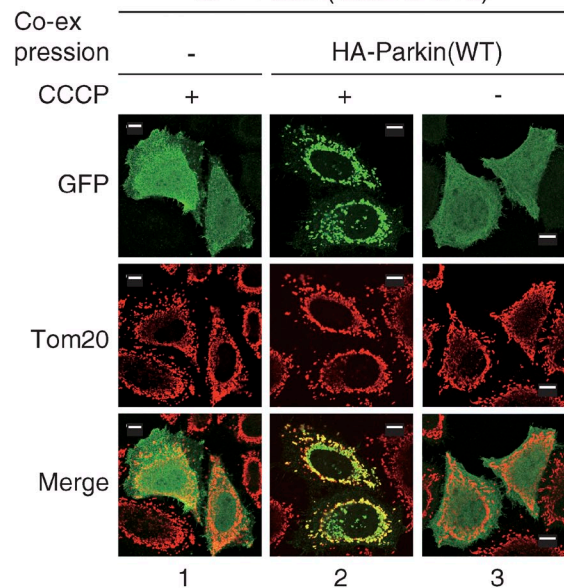

Figure S5. Immunocytochemical analyses suggest recruitment of Parkin by mitochondrial phosphorylated ubiquitin and recruitment of LC3 and p62 by a mitochondrial ubiquitin chain. (A) In *PINK1* KO HeLa cells, GFP-LC3 does not merge with mitochondria under steady-state conditions (1), whereas Mt-4xUb and Mt-4xUb(S65D) trigger obvious accumulation of LC3 on energized TMRE-stainable mitochondria (2 and 3). (B) Endogenous p62 is dispersed throughout the cytosol (1), whereas it accumulates on mitochondria in Mt-4xUb- or Mt-4xUb(S65D)-expressing cells (2 and 3). (C) HeLa cells stably expressing *PINK1* were transfected with WT GFP-Parkin or phosphomimetic GFP-Parkin (S65E mutant), treated with CCCP and LLOMe, and then immunostained with the indicated antibodies. WT and phosphomimetic Parkin were transported to mitochondria (see also Fig. 5 C) regardless of LLOMe treatment. (D) HeLa cells expressing GFP-Parkin(S65E/C431S) with or without WT HA-Parkin were treated with CCCP (10 μM, 1.5 h), and immunostained with anti-GFP and anti-Tom20 antibodies. Mislocalization of the GFP-Parkin(S65E/C431S) mutant after CCCP treatment was complemented by coexpressing WT Parkin in trans. Bars, 10 μm.

Table S1. List of plasmids used

| Vector                                                             | Description                                                                           | Source               |
|--------------------------------------------------------------------|---------------------------------------------------------------------------------------|----------------------|
| pGEX-6P-1-TcPINK1                                                  | For expression of TcPINK1 in <i>E. coli</i>                                           | Koyano et al., 2014  |
| pEGFP-C1-Parkin WT                                                 | For expression of GFP-Parkin WT                                                       | Matsuda et al., 2010 |
| pEGFP-C1-Parkin S65E                                               | For expression of GFP-Parkin S65E                                                     | Iguchi et al., 2013  |
| pEGFP-C1-Parkin C431S                                              | For expression of GFP-Parkin C431S                                                    | Iguchi et al., 2013  |
| pEGFP-C1-Parkin S65E/C431S                                         | For expression of GFP-Parkin S65E/C431S                                               | Iguchi et al., 2013  |
| pcDNA3.1-HA-Parkin WT                                              | For expression of HA-Parkin WT                                                        | Matsuda et al., 2010 |
| pcDNA3.1-Mt-Parkin WT                                              | For expression of Mt-HA-Parkin WT                                                     | This study           |
| pcDNA3-4xUb                                                        | For expression of V5-Ub G76V                                                          | This study           |
| pcDNA3-4xUb S65D                                                   | For expression of V5-Ub S65D/G76V                                                     | This study           |
| pcDNA3-Mt-4xUb                                                     | For expression of Tom20 N33-V5-Ub G76V                                                | This study           |
| pcDNA3-Mt-4xUb S65D                                                | For expression of Tom20 N33-V5-Ub S65D/G76V                                           | This study           |
| pcDNA3-Mt-4xUb S65A                                                | For expression of Tom20 N33-V5-Ub S65A/G76V                                           | This study           |
| pCMVTNT(d1)-PINK1 WT -3HA                                          | For weekly expression of PINK1 WT -3HA                                                | Okatsu et al., 2012  |
| pMXs-puro-PINK1 WT -3FLAG                                          | For expression of PINK1 WT -3FLAG                                                     | Matsuda et al., 2010 |
| pMXs-puro-PINK1 KD -3FLAG                                          | For expression of PINK1 KD -3FLAG                                                     | Matsuda et al., 2010 |
| pMXs-puro-PINK1 $\Delta$ N155 -3FLAG                               | For expression of PINK1 $\Delta$ N155 -3FLAG                                          | Matsuda et al., 2010 |
| pGEX-6P-1-GST-Parkin WT                                            | For expression of GST-RnParkin WT in <i>E. coli</i>                                   | Trempe et al., 2013  |
| pGEX-6P-1-GST-Parkin S65E                                          | For expression of GST-RnParkin S65E in <i>E. coli</i>                                 | Koyano et al., 2014  |
| pcDNA3-Ub <sup>f</sup> -L40-IRES-HA-Ub <sup>f</sup> -S27a          | For inducible expression of Ub <sup>f</sup> -L40 and HA-Ub <sup>f</sup> -S27a         | Xu et al., 2009      |
| pcDNA3-Ub <sup>f</sup> S65A-L40-IRES- HA-Ub <sup>f</sup> S65A-S27a | For inducible expression of Ub <sup>f</sup> S65A-L40 and HA-Ub <sup>f</sup> S65A-S27a | This study           |

KD, kinase dead; Ub<sup>f</sup>, siRNA-resistant ubiquitin; IRES, ribosomal entry site

## References

- Iguchi, M., Y. Kujuro, K. Okatsu, F. Koyano, H. Kosako, M. Kimura, N. Suzuki, S. Uchiyama, K. Tanaka, and N. Matsuda. 2013. Parkin-catalyzed ubiquitin-ester transfer is triggered by PINK1-dependent phosphorylation. *J. Biol. Chem.* 288:22019–22032. <http://dx.doi.org/10.1074/jbc.M113.467530>
- Koyano, F., K. Okatsu, H. Kosako, Y. Tamura, E. Go, M. Kimura, Y. Kimura, H. Tsuchiya, H. Yoshihara, T. Hirokawa, et al. 2014. Ubiquitin is phosphorylated by PINK1 to activate parkin. *Nature*. 510:162–166.
- Matsuda, N., S. Sato, K. Shiba, K. Okatsu, K. Saisho, C.A. Gautier, Y.S. Sou, S. Saiki, S. Kawajiri, F. Sato, et al. 2010. PINK1 stabilized by mitochondrial depolarization recruits Parkin to damaged mitochondria and activates latent Parkin for mitophagy. *J. Cell Biol.* 189:211–221. <http://dx.doi.org/10.1083/jcb.200910140>
- Okatsu, K., T. Oka, M. Iguchi, K. Imamura, H. Kosako, N. Tani, M. Kimura, E. Go, F. Koyano, M. Funayama, et al. 2012. PINK1 autophosphorylation upon membrane potential dissipation is essential for Parkin recruitment to damaged mitochondria. *Nat. Commun.* 3:1016. <http://dx.doi.org/10.1038/ncomms2016>
- Trempe, J.F., V. Sauvé, K. Grenier, M. Seirafi, M.Y. Tang, M. Ménade, S. Al-Abdul-Wahid, J. Krett, K. Wong, G. Kozlov, et al. 2013. Structure of parkin reveals mechanisms for ubiquitin ligase activation. *Science*. 340:1451–1455. <http://dx.doi.org/10.1126/science.1237908>
- Xu, M., B. Skaug, W. Zeng, and Z.J. Chen. 2009. A ubiquitin replacement strategy in human cells reveals distinct mechanisms of IKK activation by TNF $\alpha$  and IL-1 $\beta$ . *Mol. Cell*. 36:302–314. <http://dx.doi.org/10.1016/j.molcel.2009.10.002>
